# Supplementary material for: Anti-Biofilm Activity of Oleacein and Oleocanthal from Extra-Virgin Olive Oil toward Pseudomonas aeruginosa
Source: MDPI journal article supplement (doi:10.3390/ijms25095051), 2024-05-06
Supplement: s1 [file s1]

**Supplementary Table S1.** Antibiotic susceptibility of human clinical isolates of *P. aeruginosa*

Supplementary Table S1. Antibiotic susceptibility of human clinical isolates of *P. aeruginosa*

| <i>P. aeruginosa</i><br>strains | Antibiotic<br>class                      | Antibiotic agent        | MIC<br>(µg/ml) | Breakpoint<br>(S/R) |
|---------------------------------|------------------------------------------|-------------------------|----------------|---------------------|
| PA BL                           |                                          |                         |                |                     |
|                                 | Cephalosporins                           | Ceftazidime             | 16             | R                   |
|                                 |                                          | Cefepime                | 16             | R                   |
|                                 | Beta lactam<br>inhibitor<br>combinations | Ceftazidime/avibactam   | ≥16            | R                   |
|                                 |                                          | Ceftolozane/ tazobactam | 2              | S                   |
|                                 |                                          | Piperacillin/tazobactam | ≥128           | R                   |
|                                 | Fluoroquinolones                         | Ciprofloxacin           | ≥4             | R                   |
|                                 | Polymixin                                | Colistin                | ≤0.5           | S                   |
|                                 | Aminoglycosides                          | Gentamicin              | ≥16            | IE                  |
|                                 |                                          | Tobramycin              | ≥16            | R                   |
|                                 |                                          | Amikacin                | 32             | R                   |
|                                 | Carbapenems                              | Imipenem                | ≥16            | R                   |
|                                 |                                          | Meropenem               | ≥16            | R                   |
| PA SW                           |                                          |                         |                |                     |
|                                 | Cephalosporins                           | Cefepime                | 2              | S                   |
|                                 |                                          | Ceftazidime             | 2              | I                   |
|                                 | Beta lactam<br>inhibitor<br>combination  | Ceftazidime/avibactam   | 2              | S                   |
|                                 |                                          | Ceftolozane/ tazobactam | 0.5            | S                   |
|                                 |                                          | Piperacillin/tazobactam | ≤4             | I                   |
|                                 | Fluoroquinolones                         | Ciprofloxacin           | 0.5            | I                   |
|                                 | Aminoglycosides                          | Gentamicin              | ≤1             | IE                  |
|                                 |                                          | Tobramycin              | ≤1             | S                   |
|                                 |                                          | Amikacin                | 2              | S                   |
|                                 | Carbapenems                              | Imipenem                | 1              | I                   |
|                                 |                                          | Meropenem               | ≤0.25          | S                   |

S = susceptible; R = resistant; IE = insufficient evidence; I = increased exposure. 1 Breakpoints established by EUCAST (EUCAST guideline version 12.0, January 2022).
